# Supplementary material for: A diagram for evaluating multiple aspects of model performance in simulating vector fields
Source: Copernicus journal article supplement (doi:10.5194/gmd-9-4365-2016), 2016-12-06
Supplement: Supplementary file [file gmd-9-4365-2016-supplement-title-page.pdf › gmd-9-4365-2016-supplement-title-page.pdf]

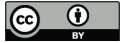

## *Supplement of*

# **A diagram for evaluating multiple aspects of model performance in simulating vector fields**

**Zhongfeng Xu et al.**

*Correspondence to:* Zhongfeng Xu (xuzhf@tea.ac.cn)

- gmd-9-4365-2016-supplement-title-page.pdf
- fig2
  - Fig2.m
  - README.txt
  - Rv.m
  - rotangle.m
  - vectorA.mat
- fig6a
  - Fig6a.ncl
  - README.txt
  - VFE\_diagram.ncl

The copyright of individual parts of the supplement might differ from the CC-BY 3.0 licence.
